# Supplementary material for: Dietary Inference from Upper and Lower Molar Morphology in Platyrrhine Primates
Source: PLoS One. 2015 Mar 4;10(3):e0118732. doi: 10.1371/journal.pone.0118732 (PMC4349698; doi:10.1371/journal.pone.0118732)
Supplement: S1 Table — Sheet 1 for lower molars. Sheet 2 for upper molars. Sheet 3 for combined upper and lower molars. (XLSX) [file pone.0118732.s001.xlsx]

## Sheet: raw data
Species	Specimen	Sex	UM1 Occlusal Relief	Crown Surface Area (UM1)	Projected Surface Area (UM1)	UM1 Relief Index	Crown Surface Area (Lm1)	Projected Surface Area (Lm1)	Lm1 Relief Index	UM1 crest 1 length	UM1 crest 2 length	UM1 crest 3 length	UM1 crest 4 length	UM1 crest 5 length	UM1 crest 6 length	Sum UM1 crest lengths	UM1 mesiodistal length	Lm1 crest 1 length	Lm1 crest 2 length	Lm1 crest 3 length	Lm1 crest 4 length	Lm1 crest 5 length	Lm1 crest 6 length	Sum Lm1 crest lengths	Lm1 mesiodistal length
Alouatta palliata	AMNH 17230	F	1.719	122.292	52.365	0.424	132.958	47.468	0.478	2	2.32258	2.70968	2.25806	5.07	2.21	16.5703	7.22581	1.82	2.73	3.055	2.925	2.665	1.495	14.69	6.76
Alouatta palliata	AMNH 18933	F	1.75	183.746	54.753	0.605	141.844	58.868	0.512	1.80645	2.58065	2.64516	2.25806	5.07	2.21	16.5703	7.54839	1.885	2.535	2.795	2.275	2.47	1.495	13.455	7.605
Alouatta palliata	AMNH 28425	M	1.738	143.185	63.343	0.408	150.757	56.868	0.498	1.93548	2.19355	2.64516	2.64516	5.785	2.665	17.8694	8.25806	2.08	2.275	2.73	2.6	2.73	1.885	14.3	7.8
Alouatta palliata	AMNH 29848	M	1.657	137.246	59.043	0.422	147.577	52.105	0.483	1.80645	2.45161	2.45161	2.58065	5.72	2.34	17.3503	7.67742	1.625	2.6	3.25	2.275	2.73	1.82	14.3	7.8
Alouatta palliata	AMNH 66705	F	1.832	140.025	57.085	0.449	154.709	50.833	0.521	1.87097	2.06452	2.96774	2.25806	5.2	2.08	16.4413	7.48	2.08	1.69	2.925	2.925	2.86	1.69	14.17	7.605
Alouatta palliata	AMNH 128111	M	1.634	132.53	53.839	0.45	142.003	47.571	0.513	1.93548	2.45161	2.70968	2.19355	5.265	2.34	16.8953	7.67742	1.365	2.47	3.185	2.015	2.34	1.95	13.325	7.8
Alouatta palliata	AMNH 147774	F	1.732	127.612	52.136	0.448	127.251	43.89	0.478	2.12903	2.3871	2.51613	2.25806	5.72	1.95	16.9603	7.48387	1.885	2.47	2.6	2.47	2.145	2.47	14.04	7.15
Alouatta seniculus	AMNH 23352	F		113.915	44.592	0.469	126.812	40.517		2.31	2.12	2.37	2.05	4.62	2.25	15.72	6.93	1.74366	2.9061	3.29358	2.32488	2.51862	2.06656	14.8534	7.1038
Alouatta seniculus	AMNH 23550	F	1.8	117.549	46.014	0.469	120.916	40.378	0.521	2.25	2.31	2.57	2.57	4.56	2.37	16.63	7.06	2.06656	2.5832	2.77694	2.06656	3.229	2.5832	15.3055	6.84548
Alouatta seniculus	AMNH 36477	F	1.716	107.718	44.387	0.443	112.272	39.027	0.505	2.05	2.37	2.18	2.44	4.62	1.73	15.39	7.51	1.80824	2.2603	2.84152	2.45404	3.03526	2.5832	14.9826	7.03922
Alouatta seniculus	AMNH 64038	M	1.994	139.007	49.56	0.516	150.109	46.37	0.598	2.25	2.7	2.57	2.7	4.49	2.25	16.96	7.44	1.9374	2.9061	2.97068	2.5832	3.229	1.6145	15.2409	6.91006
Alouatta seniculus	AMNH 98864	F	1.788	113.059	44.823	0.463	117.578	38.72	0.572	1.35	2.57	2.7	2.57	5.13	2.05	16.37	7.32	1.87282	2.13114	2.64778	2.45404	2.64778	1.2916	13.0452	6.84548
Aotus vociferans	AMNH 67692	F	1.553	29.4014	12.04	0.446	22.5133	8.365	0.562	1.21875	0.875	0.9375	0.875	1.2	1.22	6.32625	3.5	0.9375	0.875	1.09375	0.9375	1	1.0625	5.90625	3.28125
Aotus vociferans	AMNH 68223	M	1.648	27.0211	11.836	0.413	24.5527	8.891	0.505	0.84375	0.9375	1.0625	0.9375	1.66	1.31	6.75125	3.28125	0.625	1	1.28125	0.78125	1	1.09375	5.78125	3.21875
Aotus vociferans	AMNH 68225	F	1.795	23.0884	9.18	0.461	21.2077	7.899	0.551	0.625	1.03125	1.0625	1.03125	1.47	1.25	6.47	2.9375	0.78125	1.09375	1	0.9375	1.40625	0.6875	5.90625	3.09375
Aotus vociferans	AMNH 72056	F	1.751	28.2738	11.518	0.449			0.512	1.0625	1.3125	1.0938	0.9375	1.46875	1.21875	7.0938	3.5	0.8125	0.975	1.5275	1.1375	0.975	0.6825	6.11	3.3475
Aotus vociferans	AMNH 72059	M	1.708	23.0453	9.813	0.427	19.7168	7.364	0.527	0.6875	0.96875	1.0625	0.96875	1.04	1.11	5.8375	3.125	0.90625	0.78125	0.9375	1.15625	1.125	0.9375	5.84375	3.125
Aotus vociferans	AMNH 72060	F	1.856	26.6926	9.722	0.505	26.1539	8.889	0.569	1.21875	0.9375	0.9375	0.9375	1.81	1.09	6.93125	3.28125	1.125	0.84375	1.09375	0.9375	1.25	1.0625	6.3125	3.125
Aotus vociferans	AMNH 72065	F	1.701	26.1319	10.5	0.456	27.3195	8.948	0.556	1.125	1	1.125	1	0.98	1.14	6.37	3.1875	0.9375	0.96875	1.1875	0.875	1.03125	1.09375	6.09375	3.21875
Aotus vociferans	AMNH 73417	F	1.789	28.4151	12.062	0.428	25.7487	9.209	0.508	0.90625	1.0625	1.0625	1.0625	1.88	1.41	7.38375	3.375	1.09375	0.90625	1.125	0.90625	1.21875	1.09375	6.34375	3.375
Aotus vociferans	AMNH 73431	M	1.771	29.1654	12.248	0.434	27.3842	9.054	0.527	1	1.0625	1.15625	1.0625	1.88	1.25	7.41125	3.40625	1.03125	1.0625	1.28125	0.9375	1.3125	0.71875	6.34375	3.21875
Ateles geoffroyi	AMNH 17220	M	1.742	68.7129	25.141	0.503	74.0632	24.677	0.526	1.6	2.05	1.86	1.73	1.93	2.05	11.22	5.58	1.56	1.365	1.3	1.885	1.95	1.04	9.1	5.525
Ateles geoffroyi	AMNH 24176	F	1.689	67.5212	22.808	0.543	76.4562	25.261	0.55	1.22581	1.41935	1.93548	1.54839	3.705	1.43	11.264	5.03226	1.27	1.43	1.7	1.45	2.03	1.07	8.95	5.03
Ateles geoffroyi	AMNH 172171	F	1.748	79.3758	26.561	0.547	81.5731	27.166	0.542	1.35	1.93	1.93	1.41	1.99	1.35	9.96	5.2	1.42076	1.48534	1.2916	2.2603	1.9374	1.35618	9.75158	5.68304
Ateles geoffroyi	AMNH 176649	F	1.662	63.8882	23.037	0.51	64.857	22.825	0.531	1.41	1.35	1.8	1.28	1.86	1.6	9.3	4.68	1.2916	1.74366	1.54992	1.74366	2.13114	0.9687	9.42868	5.36014
Ateles geoffroyi	NMNH 13858	F	1.653	69.8356	23.989	0.534	76.3591	24.571	0.545	1.8	1.86	1.8	1.54	1.93	1.93	10.86	5.07	1.3	1.755	1.3	2.275	2.015	0.975	9.62	5.655
Ateles geoffroyi	NMNH 74671	M	1.774	58.0595	21.111	0.506	62.5168	21.866	0.525	1.35484	2.12903	1.74194	1.6129	3.38	1.625	11.8437	5.09677	1.625	1.43	1.17	2.08	2.015	0.975	9.295	5.135
Ateles geoffroyi	NMNH 108529	F	1.8	76.6287	26.373	0.533	80.1691	26.772	0.546	1.80645	1.93548	1.93548	1.6129	3.705	2.405	13.4003	5.16129	1.36	1.45	2.12	1.7	1.72	1.18	9.53	5.81
Ateles geoffroyi	NMNH 292234	M	1.629	63.6624	21.801	0.536	71.4636	23.021	0.53	1.41	1.86	1.73	1.35	1.86	1.28	9.49	4.81	1.625	1.69	1.365	1.755	1.95	0.715	9.1	5.2
Ateles geoffroyi	NMNH 336205		1.571	61.6876	23.208	0.489	63.6274	24.012	0.487	1.29032	1.6129	1.93548	1.03226	3.445	1.625	10.941	4.77419	0.975	1.43	2.08	1.365	1.625	1.17	8.645	5.2
Brachyteles arachnoides	MN 106	M	1.875	116.378	42.798	0.5	105.784	33.389	0.564	2.25	2.5	2.12	2.25	4.81	2.05	15.98	6.67	2.275	2.925	2.275	2.6	3.77	1.82	15.665	7.15
Brachyteles arachnoides	MN 2718	M	1.743	129.202	50.325	0.471	138.719	44.363	0.575	2.95	1.8	2.57	2.18	3.85	1.86	15.21	7.06	1.9374	2.5832	2.5832	3.229	3.68106	1.9374	15.9513	7.4267
Brachyteles arachnoides	MN 30192	F	1.726	124.98	51.608	0.442	124.997	39.317	0.55	2.25	2.7	1.86	2.05	3.91	2.31	15.08	7.06	2.06656	2.5832	2.71236	2.64778	2.5832	2.2603	14.8534	7.7496
Brachyteles arachnoides	MN 31321	M	1.865	119.56	44.743	0.491	99.1443	30.428	0.567	2.89	1.99	2.12	2.25	5.26	1.86	16.37	6.48	2.06656	2.9061	2.5832	2.64778	3.229	2.06656	15.4992	7.55586
Brachyteles arachnoides	MN 526	M	1.862	123.676	47.603	0.477	130.696	40.926	0.584	2.89	2.12	1.93	2.05	3.85	1.73	14.57	7.32	2.06656	2.2603	2.51862	2.45404	3.35816	1.6145	14.2722	7.16838
Brachyteles arachnoides	MN 7724	M	1.942	111.127	43.648	0.467	112.861	35.041	0.554	2.37	2.63	2.25	1.67	4.49	1.93	15.34	6.8	1.885	2.275	2.47	2.535	3.12	2.21	14.495	7.15
Brachyteles arachnoides	MN 8514	F	2.107	122.894	45.907	0.492	115.364	34.813	0.599	2.12903	3.22581	2.45161	2	3.88	1.88	15.5665	7.16129	2.275	2.145	1.56	2.275	3.315	2.08	13.65	7.735
Brachyteles arachnoides	MZUSP 7422	F	1.68	125.325	48.551	0.474	109.489	32.936	0.603	2.44	2.63	2.57	1.54	5.01	1.54	15.73	6.93	2.08	2.015	1.95	2.6	2.925	2.6	14.17	7.215
Brachyteles arachnoides	MZUSP 11100	F	1.768	123.404	47.274	0.48	107.592	34.531	0.54	2.25	2.89	1.8	1.93	4.56	2.31	15.74	6.8	1.95	2.535	2.6	2.275	2.86	1.95	14.17	7.15
Cacajao calvus	AMNH 70191	M	1.446	49.5075	17.838	0.51	44.0772	17.13	0.507	0.903226	1.16129	1.22581	1.16129	1.35	0.96	6.76161	4	1.25	1.40625	1.09375	1.15625	1.71875	0.71875	7.34375	4.59375
Cacajao calvus	AMNH 73717	M	1.593	55.1985	19.31	0.525	47.7445	16.848	0.533	1.30719	0.718954	1.04575	0.718954	1.48	1.48	6.75085	4.31373	1.1875	1	1.25	1.09375	1.1875	1.09375	6.8125	4.6875
Cacajao calvus	AMNH 73720	F	1.532	51.2458	18.566	0.508	45.5751	17.026	0.506	1.43791	1.11111	0.849673	1.11111	1.35	1.35	7.2098	4.05229	1.25	1.09375	1.15625	0.8125	1.9375	0.625	6.875	4.4375
Cacajao calvus	AMNH 76390	F	1.32	47.165	17.739	0.489			0.486	0.258065	1.41935	1.6129	0.967742	2.405	2.145	8.80806	4.12903	1.105	1.3	0.975	0.975	1.69	1.105	7.15	4.615
Cacajao calvus	AMNH 76391	M	1.49	54.0361	20.096	0.495	48.3076	18.75	0.494	1.03226	0.967742	1.29032	0.967742	1.38	1.5	7.13806	4.32258	1.25	1.21875	1.25	0.9375	1.3125	1	6.96875	4.6875
Cacajao calvus	AMNH 76648	F	1.621	53.319	19.398	0.506	48.3858	17.363	0.531	1.30719	0.849673	1.24183	0.849673	1.468	1.3125	7.02887	4.18301	1.0625	0.875	1.09375	1.1875	1.3125	1.25	6.78125	4.125
Cacajao calvus	AMNH 76650	M	1.545	49.0568	19.765	0.455	43.1268	17.543	0.519	1.50327	1.30719	1.04575	1.30719	1.54	1.35	8.0534	4.24837	0.9375	1.3125	1.09375	0.8125	1.5625	1	6.71875	4.625
Cacajao calvus	AMNH 76651	M	1.419	49.5708	17.815	0.512	43.064	16.669	0.528	0.83871	1.03226	1.29032	1.03226	0.94	1.31	6.44355	3.87097	1.09375	1.25	1	1.25	1.15625	0.65625	6.40625	4.0625
Cacajao calvus	AMNH 98316	M	1.445	51.2179	19.492	0.483	50.0576	19.017	0.511	1.24183	0.784314	1.04575	0.784314	1.28	1.35	6.48621	4.31373	1.25	1.1875	1.40625	0.78125	1.5625	1.25	7.4375	4.4375
Cacajao calvus	AMNH 98397	F	1.663	53.8919	19.415	0.511	47.5601	16.893	0.531	1.29032	1.67742	1.22581	0.903226	2.925	2.535	10.5568	4.12903	0.975	1.04	0.845	0.845	1.95	0.585	6.24	4.615
Callicebus cupreus	AMNH 72146	M	1.584	32.7894	13.815	0.432	28.8859	10.191	0.55	0.9063	1	1.125	1.0938	1.06	0.84	6.0251	3.5625	0.9425	1.04	1.105	1.04	1.3975	0.6825	6.2075	3.4125
Callicebus cupreus	AMNH 72156	F	1.595	33.092	13.157	0.461	28.5702	9.709	0.524	1.125	1.25	1.0938	1.0938	1	0.84	6.4026	3.4375	0.8775	1.105	1.1375	1.0725	1.3	0.715	6.2075	3.445
Callicebus cupreus	AMNH 76421	F	1.683	31.629	13.437	0.428	27.5119	9.451	0.512	1.25	1.15625	1.09375	1.15625	1.17	0.81	6.63625	3.46875	0.875	1.09375	1.25	0.9375	1.46875	0.6875	6.3125	3.4375
Callicebus cupreus	AMNH 98382	?	1.584	33.9674	13.493	0.462	29.1073	10.343	0.568	0.7813	1.25	1.1875	1.2188	1.25	0.81	6.4976	3.4375	0.8775	1.04	1.2025	1.04	1.365	0.8125	6.3375	3.51
Callicebus cupreus	AMNH 98383	F	1.533	29.1288	12.413	0.427	27.7355	9.762	0.534	1	1.03125	1.125	1.03125	1.09	0.63	5.9075	3.4375	0.8125	1.125	1.09375	0.96875	1.03125	0.75	5.78125	3.28125
Callicebus cupreus	AMNH 98384	M	1.678	35.6365	13.399	0.489	33.0151	10.417	0.533	1.125	1.09375	1.09375	1.09375	1.5	0.81	6.71625	3.5625	0.9375	1.09375	0.90625	1	1.40625	0.6875	6.03125	3.53125
Callicebus moloch	AMNH 76419	F	1.605	34.038	14.085	0.441	33.6004	11.171	0.551	1.125	1.125	1.09375	1.125	1.17	1.04	6.67875	3.59375	1.0625	1.1875	1.1875	1	0.78125	0.9375	6.15625	3.5625
Callicebus moloch	AMNH 76420	M	1.7	34.4273	13.985	0.45	28.8685	10.106	0.521	1.0625	1.09375	1.09375	1.09375	1.34	0.72	6.40375	3.59375	0.78125	1.0625	1.1875	1.21875	1.25	0.84375	6.34375	3.5625
Callicebus moloch	AMNH 98370	F?	1.652	32.6265	12.199	0.492	27.7046	9.874	0.528	1.0625	1.03125	0.9375	1.03125	1.09	1.16	6.3125	3.4375	0.71875	1.125	1.15625	1	1.21875	0.625	5.84375	3.65625
Callicebus moloch	AMNH 142275	M?	1.653	34.3361	13.69	0.46	29.7305	11.003	0.531	1.09375	1.15625	1.1875	1.15625	1.63	0.97	7.19375	3.65625	0.96875	1.21875	1.09375	1.09375	1.40625	0.625	6.40625	3.59375
Cebus capucinus	AMNH 14182	F	1.634	52.4952	20.186	0.478	43.5544	14.892	0.54	0.844156	0.714286	1.16883	0.714286	1.8	1.6	6.84156	4.28571	1.495	1.105	0.91	1.3	1.495	0.91	7.215	4.355
Cebus capucinus	AMNH 19219	M	1.526	50.8526	20.848	0.446	48.4516	18.119	0.498	1.09677	0.83871	1.41935	0.83871	1.31	1.38	6.88355	4.45161	1.1742	1.3905	1.2978	0.7725	1.3905	0.8034	6.8289	4.5423
Cebus capucinus	AMNH 19220	F	1.486	54.4964	23.856	0.413	46.3255	16.519	0.468	1.23377	0.714286	1.49351	0.714286	1.73	1.41	7.29584	4.61039	0.975	1.56	1.56	1.105	1.43	0.91	7.54	4.875
Cebus capucinus	AMNH 26860	F	1.771	55.7674	21.86	0.468	52.7128	18.316	0.524	1.29032	0.903226	1.48387	0.903226	1.31	1.5	7.39065	4.19355	1.2051	1.6377	1.854	1.0815	1.545	1.2978	8.6211	4.7895
Cebus capucinus	AMNH 29614	M	1.66	53.8354	20.879	0.474	47.5871	17.373	0.51	1.2987	0.909091	1.36364	0.909091	1.38	1.44	7.30052	4.41558	1.0815	1.6377	1.4523	1.236	1.3905	1.3905	8.1885	4.7895
Cebus capucinus	AMNH 29615	M	1.464	54.1177	21.648	0.458	44.763	16.918	0.51	1.48387	1.09677	1.22581	1.09677	1.31	1.44	7.65323	4.51613	1.0815	1.3905	0.8961	1.0815	1.1742	1.0815	6.7053	4.6968
Cebus capucinus	AMNH 38082	M	1.703	56.1941	21.996	0.469	48.287	17.489	0.545	1.42857	0.649351	1.2987	0.649351	1.93	1.54	7.49597	4.35065	0.78	1.625	1.43	1.235	1.625	0.78	7.475	4.745
Cebus capucinus	AMNH 137993	F	1.47	55.3626	24.717	0.403	45.1622	18.084	0.476	1.41935	0.967742	1.6129	0.967742	1.38	1.63	7.97774	4.58065	1.2978	1.6068	1.236	1.1124	1.3905	0.7416	7.3851	4.5732
Cebus capucinus	AMNH 139831	M	1.592	50.3518	19.916	0.464	42.1912	15.483	0.511	1.23377	0.779221	1.2987	0.779221	1.48	1.86	7.43091	4.28571	1.105	1.885	0.975	0.975	1.82	0.91	7.67	4.42
Chiropotes satanas	AMNH 37466	F	1.496	35.2882	13.088	0.496	30.6151	11.469	0.488	0.9375	0.78125	0.625	0.78125	0.83	1.28	5.235	3.34375	1.17	0.91	0.975	0.65	1.105	0.845	5.655	3.77
Chiropotes satanas	AMNH 76889	F	1.333	35.8273	13.514	0.488	31.0629	11.266	0.468	0.7656	1.3425	1.0938	0.5463	0.455	1.95	6.1532	3.4238	1.375	0.875	0.875	0.75	1.5625	0.5	5.9375	3.625
Chiropotes satanas	AMNH 77568	M	1.347	31.207	13.079	0.435	28.547	10.887	0.492	0.78125	0.9375	1.09375	0.9375	0.94	1.63	6.32	3.25	1.1742	0.5253	1.1742	0.6798	1.2669	0.8343	5.6547	3.6153
Chiropotes satanas	AMNH 78963	F	1.479	38.4245	14.973	0.471	34.1918	13.123	0.482	1.1875	0.5625	0.96875	0.5625	0.96	1.8	6.04125	3.6875	1.17	0.975	1.235	0.585	1.365	0.715	6.045	3.965
Chiropotes satanas	AMNH 94126	M	1.433	38.7741	14.372	0.496	35.6291	13.749	0.502	1.1869	1.155	0.9544	0.69	1.19	1.44	6.6163	3.4856	1.0506	1.2669	0.7107	0.6489	1.5141	0.5253	5.7165	4.017
Chiropotes satanas	AMNH 95867	F	1.498	33.0744	12.776	0.476	33.4358	12.14	0.492	0.78125	0.75	0.8125	0.75	1	1.19	5.28375	3.15625	0.6798	1.3287	0.4635	0.9888	1.854	0.3708	5.6856	3.708
Chiropotes satanas	AMNH 95871	M	1.482	35.279	13.37	0.485	29.704	11.606	0.5	1.09375	0.5625	0.96875	0.5625	0.88	1.56	5.6275	3.34375	1.1433	0.7107	1.1433	0.7416	1.3905	0.8652	5.9946	3.7389
Chiropotes satanas	AMNH 95872	F	1.579	31.8833	12.26	0.478	27.6543	10.786	0.518	1	0.71875	0.90625	0.71875	1.28	0.51	5.13375	3.34375	1.3	0.78	0.65	0.78	1.17	0.65	5.33	3.77
Lagothrix lagotricha	AMNH 78559	M	1.8	75.8677	29.886	0.466	81.0264	26.656	0.549	1.6129	1.22581	2.19355	1.22581	2	1.81	10.0681	5.41935	1.6145	1.67908	1.6145	1.74366	1.9374	1.42076	10.0099	5.42472
Lagothrix lagotricha	MN 2729	F	1.749	66.5484	26.372	0.463	75.7284	23.159	0.526	1.17647	1.30719	1.56863	1.30719	1.93	1.6	8.88948	5.1634	1.495	1.495	1.625	1.365	1.885	1.56	9.425	5.33
Lagothrix lagotricha	NMNH 267508	F	1.611	91.0271	34.012	0.492	101.259	36.836	0.529	1.74194	1.48387	2.25806	1.48387	1.88	1.94	10.7877	5.87097	1.67908	1.74366	1.9374	1.54992	2.38946	1.42076	10.7203	6.19968
Lagothrix lagotricha	NMNH 397775	M	1.692	83.7946	31.711	0.486	98.8144	34.66	0.539	1.83007	1.04575	1.50327	1.04575	2.05	1.86	9.33484	5.4902	1.625	1.755	1.69	1.69	2.145	1.69	10.595	5.72
Lagothrix lagotricha	NMNH 398460	unk	1.866	78.4324	28.766	0.502	86.6836	28.349	0.559	2	2.19355	2	1.54839	3.965	1.95	13.6569	5.41935	1.755	2.015	1.495	1.82	2.08	1.3	10.465	5.59
Lagothrix lagotricha	NMNH 538105	F	1.559	81.5046	31.377	0.477	95.9115	31.983	0.516	1.29032	1.29032	2	1.29032	1.56	1.5	8.93097	5.41935	1.74366	1.6145	1.6145	1.9374	1.74366	1.35618	10.0099	6.00594
Lagothrix lagotricha	NMNH 545878	F	1.646	65.0374	27.292	0.434	74.4725	26.894	0.51	1.93548	2.06452	1.93548	1.35484	4.03	1.625	12.9453	5.29032	1.495	1.365	1.885	1.95	2.08	1.625	10.4	5.525
Lagothrix lagotricha	NMNH 545879	M	1.687	61.0265	24.522	0.456	76.23	25.015	0.51	1.63399	1.11111	1.96078	1.11111	1.99	1.73	9.53699	4.96732	1.3	1.43	1.625	1.43	1.755	1.3	8.84	5.265
Lagothrix lagotricha	NMNH 545887	F	1.644	78.241	30.097	0.478	93.0382	32.192	0.521	1.6129	2.70968	1.93548	1.6129	4.03	1.69	13.591	5.87097	1.17	1.625	1.95	2.275	1.95	1.56	10.53	5.915
Pithecia irrorata	AMNH 91751	M	1.563	41.9726	14.39	0.535	34.1133	12.788	0.517	1.16883	0.779221	0.974026	0.779221	1.28	0.9	5.8813	3.8961	1.0625	1.09375	0.78125	0.625	0.875	0.46875	4.90625	3.84375
Pithecia irrorata	AMNH 91753	F	1.507	39.4236	14.064	0.515	37.5504	13.106	0.533	1.16883	0.844156	1.03896	0.844156	1	1.25	6.1461	3.7013	0.96875	1	1.03125	0.90625	1.28125	0.625	5.8125	3.78125
Pithecia irrorata	AMNH 91754	F	1.392	38.8022	14.223	0.502	30.8863	12.149	0.524	1.09677	1.03226	0.967742	1.03226	1.44	0.75	6.31903	3.74194	1.0625	1.1875	0.8125	0.9375	1.40625	0.59375	6	3.78125
Pithecia irrorata	AMNH 92318	M	1.787	42.8023	15.238	0.516	38.1971	13.23	0.54	1.2987	0.779221	0.974026	0.779221	1.28	1.41	6.52117	3.7013	1.0625	0.96875	1	0.75	1.0625	0.875	5.71875	3.78125
Pithecia irrorata	AMNH 92320	M	1.464	37.9751	15.331	0.454	35.9238	13.688	0.49	1.1039	0.844156	0.844156	0.844156	1.16	1.35	6.14636	3.7013	1.09375	0.96875	1	0.875	1.25	0.5	5.6875	3.84375
Pithecia irrorata	AMNH 92824	M	1.682	39.7771	16.777	0.432	43.3195	15.604	0.512	1.23377	0.909091	0.909091	0.909091	1.22	1.35	6.53104	4.02597	1.3125	0.90625	0.8125	0.90625	1.34375	0.5	5.78125	3.90625
Pithecia irrorata	AMNH 92825	F	1.452	35.934	14.301	0.461	36.7046	14.021	0.511	0.774194	0.903226	1.03226	0.903226	1.22	1.35	6.1829	3.67742	1.28125	0.875	0.96875	0.78125	1.28125	0.34375	5.53125	3.78125
Pithecia irrorata	AMNH 93101	M	1.458	40.5518	15.927	0.467	36.919	13.525	0.513	0.967742	0.903226	0.903226	0.903226	1.03125	1.1875	5.89617	3.6129	1.53125	0.9375	0.625	0.78125	1.46875	0.8125	6.15625	3.6875
Pithecia irrorata	AMNH 93649	M	1.456	45.5778	17.822	0.47	43.1413	16.06	0.478	0.709677	0.903226	1.16129	0.903226	1.19	1.38	6.24742	4	1.21875	0.875	0.78125	1.4375	1.3125	0.96875	6.59375	4
Saimiri boliviensis	AMNH 211592	M	1.773	25.4181	10.03	0.465	17.2425	5.523	0.538	0.96875	0.90625	0.96875	0.90625	1.88	1.09	6.72	2.625	0.90625	0.9375	1	0.71875	0.625	0.625	4.8125	2.90625
Saimiri boliviensis	AMNH 211629	M	1.905	23.7833	9.056	0.483	16.672	5.309	0.539	0.9375	1	1.0938	0.7813	1.59375	0.78125	6.1876	2.7188	0.9425	0.8125	1.17	0.975	0.845	0.6175	5.3625	2.86
Saimiri boliviensis	AMNH 211647	M	1.922	20.8955	8.19	0.468	16.6038	5.292	0.539	0.78125	1.09375	1.09375	1.09375	1	0.90625	5.96875	2.6875	0.625	0.9375	0.96875	0.65625	0.71875	0.6875	4.59375	2.71875
Saimiri boliviensis	AMNH 211650	F	1.782	22.5798	8.668	0.479	16.7737	5.628	0.538	0.8125	0.84375	0.96875	0.84375	1.81	0.88	6.15875	2.625	0.65625	1.125	1.21875	0.53125	0.6875	0.75	4.96875	2.71875
Saimiri boliviensis	AMNH 230821	F	1.873	22.7991	9.23	0.452	18.2863	6.299	0.508	0.9375	0.78125	0.96875	0.78125	1.84	0.94	6.24875	2.875	0.8125	1	1	0.6875	0.90625	0.5625	4.96875	2.8125
Saimiri boliviensis	AMNH 230823	M	1.722	22.1238	9.023	0.448	18.2565	6.187	0.545	0.84375	0.78125	1.09375	0.78125	1.43	0.81	5.74	2.71875	0.625	1	1.03125	0.71875	0.75	0.5625	4.6875	2.71875
Saimiri boliviensis	AMNH 239870	F	1.985	26.1432	10.165	0.472	17.1199	6.019	0.547	0.9375	0.78125	1.0625	0.78125	1.38	1.13	6.0725	2.9375	0.8125	0.875	1.25	0.8125	0.625	0.96875	5.34375	2.84375
Saimiri boliviensis	AMNH 239873	M	1.871	23.1261	9.322	0.454	15.2705	5.519	0.528	1.03125	0.875	1.09375	0.875	1.56	0.85	6.285	2.6875	0.875	1.0625	1.0625	1.03125	0.875	0.65625	5.5625	2.8125
Saimiri boliviensis	AMNH 255858	M	1.789	25.514	9.932	0.472	18.3162	6.27	0.488	0.78125	0.84375	0.96875	0.84375	1.69	0.94	6.0675	2.84375	0.6875	0.9375	1.09375	0.65625	0.75	0.5625	4.6875	2.6875
NOTES:	length measurements are presented in mm, area measurements are presented in mm2
	UM1 = first upper molar, Lm1 = first lower molar
	Museum abbreviations as follows: AMNH, American Museum of Natural History; NMNH, Smithsonian National Museum of Natural History; MZUSP, Museu de Zoologia da Universidade de São Paulo; MN, Museu Nacional -Rio ????
